# Supplementary material for: Revisiting Antipsychotic-induced Akathisia: Current Issues and Prospective Challenges
Source: PubMed Central journal article supplement — Curr Neuropharmacol. 2017 Jul;15(5):789–98. doi: 10.2174/1570159X14666161208153644 (PMC5771055; doi:10.2174/1570159x14666161208153644), 2017-07
Supplement: CN-15-789_SD1.pdf [file CN-15-789_SD1.pdf]

## SUPPLEMENTARY MATERIAL

### Revisiting Antipsychotic-induced Akathisia: Current Issues and Prospective Challenges

Haitham Salem<sup>a,b</sup>, Caesa Nagpal<sup>b</sup>, Teresa Pigott<sup>b</sup> and Antonio Lucio Teixeira<sup>a,b,\*</sup>

<sup>a</sup>Neuropsychiatry Program, Department of Psychiatry and Behavioral Sciences, McGovern Medical School, The University of Texas Health Science Center, Houston, Texas, USA; <sup>b</sup>Harris County Psychiatric Center, Department of Psychiatry and Behavioral Sciences, McGovern Medical School, The University of Texas Health Science Center, Houston, Texas, USA

**Supplementary Table 1. Ongoing clinical trials on akathisia management as listed on the clinicaltrials.gov website.**

|    | Study       | Drug                                | Design/type                                   | Classification                     | Estimated Enrollment/<br>Follow-up Period | Outcomes                                                                                                                |
|----|-------------|-------------------------------------|-----------------------------------------------|------------------------------------|-------------------------------------------|-------------------------------------------------------------------------------------------------------------------------|
| 1  | NCT00693472 | Preladenant                         | Randomized/<br>Interventional<br>Double blind | Exploratory Efficacy<br>(Phase II) | 46/ 13 days                               | Completed with no<br>published results                                                                                  |
| 2  | NCT00065286 | Neuroleptics                        | Observational/<br>Longitudinal                | Phase III                          | Not specified/ 6months                    | Completed with no<br>published results                                                                                  |
| 3  | NCT01051271 | Midazolam                           | Randomized/<br>Interventional<br>Double blind | Phase II/Phase III                 | 225/ 15 minutes                           | Completed with no<br>published results                                                                                  |
| 4  | NCT01069536 | Metoclopramide                      | Randomized/<br>Interventional<br>Double blind | Phase III                          | 140/ 2 and 15 minutes                     | Completed with no<br>published results                                                                                  |
| 5  | NCT01942343 | Droperidol<br>Ondansetron           | Randomized/<br>Interventional<br>Double blind | Phase III                          | 300/ 1 day                                | Not yet recruiting                                                                                                      |
| 6  | NCT00659919 | Trazodone                           | Randomized/<br>Interventional<br>Double blind | Phase IV                           | 13/ 3 days                                | Completed with no<br>published results                                                                                  |
| 7  | NCT00475306 | Metoclopramide<br>Diphenhydramine   | Randomized/<br>Interventional<br>Double blind | Phase IV                           | 289/ 60 minutes                           | Preliminary outcomes show<br>lower levels of akathisia<br>upon combination of<br>metoclopramide with<br>Diphenhydramine |
| 8  | NCT00892047 | Venlafaxine XR<br>plus Aripiprazole | Randomized/<br>Interventional<br>Double blind | Phase IV                           | 468/ 12 weeks                             | Lenze <i>et al.</i> , 2015                                                                                              |
| 9  | NCT00686699 | Preladenant                         | Randomized/<br>Interventional<br>Double blind | Exploratory Efficacy<br>(Phase II) | 11/ 6 hours and 14 days                   | Terminated                                                                                                              |
| 10 | NCT00403546 | Geodon                              | Randomized/<br>Interventional<br>Double blind | Phase III                          | 80/ 8 weeks                               | Completed with no<br>published results                                                                                  |

|    |             |                                            |                                                                              |                                    |                                       |                                        |
|----|-------------|--------------------------------------------|------------------------------------------------------------------------------|------------------------------------|---------------------------------------|----------------------------------------|
| 11 | NCT00772005 | Armodafinil                                | Randomized/<br>Interventional<br>Double blind                                | Exploratory Efficacy<br>(Phase II) | 287/ 24 weeks                         | Kane <i>et al.</i> , 2012              |
| 12 | NCT01457339 | SPD489<br>(Lisdexamfetamine<br>dimesylate) | Randomized/<br>Interventional<br>Double blind                                | Phase I                            | 31/ 5 days                            | Completed with no<br>published results |
| 13 | NCT00261443 | Aripiprazole                               | Randomized/<br>Interventional<br>Double blind                                | Phase IV                           | 1270/52 weeks                         | Marcus <i>et al.</i> , 2011            |
| 14 | NCT01438060 | Aripiprazole                               | Randomized/<br>Interventional<br>Double blind                                | Phase III                          | 232/ 10 weeks                         | Completed with no<br>published results |
| 15 | NCT00190749 | Olanzapine                                 | Randomized/<br>Interventional<br>Double blind                                | Phase IV                           | 130/ 12 weeks                         | Case <i>et al.</i> , 2010              |
| 16 | NCT01760993 | SPD489                                     | Study safety/<br>Open label/<br>Interventional<br>single group<br>assignment | Phase III                          | 2/52 weeks                            | Terminated                             |
| 17 | NCT01670279 | Brexpiprazole                              | Randomized/<br>Interventional<br>Double blind                                | Phase I                            | 18/ 45 days                           | Completed with no<br>published results |
| 18 | NCT01909466 | Aripiprazole, OPC-<br>14597                | Study safety/<br>Open label/<br>Interventional                               | Phase I                            | 141/ 20 weeks                         | Completed with no<br>published results |
| 19 | NCT00227305 | Quetiapine<br>fumarate                     | Study safety/<br>Open label/<br>Interventional                               | Phase III                          | 381/ 26 weeks                         | Finding <i>et al.</i> , 2013           |
| 20 | NCT02435836 | Aripiprazole                               | Study safety/<br>Open label/<br>Interventional                               | Phase III                          | 631/ 108 weeks then<br>every 12 weeks | Terminated                             |
